# Supplementary material for: CNTN5-/+or EHMT2-/+human iPSC-derived neurons from individuals with autism develop hyperactive neuronal networks
Source: eLife. 2019 Feb 12;8:e40092. doi: 10.7554/eLife.40092 (PMC6372285; doi:10.7554/eLife.40092)
Supplement: Figure 3—figure supplement 1—source data 1. [file elife-40092-fig3-figsupp1-data1.xlsx]

## Sheet: Sheet1
	NR3	16K	16N	15E	15G	17E	17G	26E	26J	27H	27N	36O	36P	21H	21P	20C	20E	75G	75H	54E	54G	53G	53H	19A	18C	18E	18CW	51C	51E	52A	52C	50A	50B	50H	48K	48N	49H	49G	64N	64Q	63Q	63T	62M	62X	61I	61K	37E	38B	38E
MFR_week4		0.01217		0.018358		0.014851	0.007219		0.01052						0.083059	0.067023		0.534035	0.127878	0.032591	0.018914	0.260107		0.014645				0.190182				0.010726	0.011964			0.036097	0.044554		0.156042	0.121458	0	0.102083	0.002083	0.024583	0.000208	0.06		1.41502	0.015883
		0.02764		0.031766		0.160066	0.075701		0.000413						0.008224	0.018914		0.363449	0.015625	0.395421	0.063734	0.083952		0.12005				0.395008				0.006188	0.0658			0.015058	0.018564		0.258333	0.195208	0.427292	0.000208	0.000417	0.086667	0.144167	0.205208		1.33725	0.106642
		0.005157		0.0658		0.017533	0.009901		0.000413						0.016447	0.004729		1.34571	0.078125	0.077558	0.001439	0.3158		0.055693				0.144596				0.050743	0.010726			0.075701	0.226691		0.556042	0.026875	0.020208	0.000208	0.00375	0.0775	0.093125	0.168542		0.969884	0.362211
		0.0592		0.221741		0.056931	0.087871		0.009076						0.026727	0.001028		0.777434	0.203947	0.148102	0.0294	0.535891		0.011757				0.40429				0.004538	0.002888			0.002888	0.001031		0.394167	0.077083	0.300208	0.000417	0.004583	0.231875	0.131458	0.061875		0.910685	0.10066
	0.153465		0.693022	0.082302	0.00165	0.03486	0.004125	0.283416	0.086015	0.000206	0.010691	0.063738	0		0.021793	0.002467		0.459365	0.097862	0.11283	0.0294	0.493193		0.086015	0.209365	1.2731	0.061881	0.186262	0.000619	9.11696	0.075289	0.007632	0.044348	0.02929	0.002269	0.005363	0.003919	0.008457	0.679792	0.085208	0.020208	0.000417	0.010833	0.213958	0.095417	0.053958	0.001444	0.78321	0.189975
	0.001444		0.51569	0.008251	0.001238	0.068276	0.010314	0.331271	0.021452	0.000617	0.024671	0.071163	0.001645		0.020148	0.001234		0.415842	0.080181	0.156147	0.000822	0.499587		0.157178	0.18255	1.89522	0.030941	0.455033	0.668523	5.69121	0.968853	0.000825	0.0033	0	0.123969	0.039398	0.134695	0.022277	0.577708	0.061667	0.000417	0.054167	0.000625	0.053333	0.077292	0.179375	0	0.532797	0.648102
	0.008045		0.251239		0.000206			0.180487		0.000822	0.028372	0.220297	0.00185					0.351279							0.161716	1.11097	0.111592	0.348804	0.068894	0.821576	0.607261			0.002063	0.000413			0.023927									0.01547	0.829414
	0.000413	0.204583	0.183526	0.0821635	0	0.325145	0.454996	0.39212	0.004112	0	0.005962	0.003094	0		0.543729	0.143564		0.436881	0.188119		0.042079			0.132838	0.062294	0.82797	0.08849	0.374381	0.302186	0.114274	0.244018	0.304104	0.161007	0	0.000825	0.078172	0.259888	0.000206	0.212334	0.055257	0.072641	0.249379	0.525869	0.946399	0.082368	0.006623	0.045998	0.997731	4.10994
	0.077351	0.275186	0.343931	0.620768	0	0.2436	0.864988	0.358705	0.021587	0.002262	0.053865	0.032591	0.003084		0.118606	0.339109		0.547442	0.08849		0.156559			0.203589	0.125206	1.65367	0.11448			0.054868	0.161304	0.057463	0.08097	0	0.000413	0.120522	0.145522	0.085602	0.180257	0.033113	0.268212	0.369205	0.307119	1.10555	0.139487	0.045944	0.032591		3.76753
	0.002269	0.503922	0.210776	0.297481	0.018358	0.861065	0.67114	0.493399	0.002673	0.016242	0.062294	0.039398	0		0.635314	0.171205		0.502682	0.192657		0.037748			0.414604	0.097566	1.14645	0.357261			0.205446	1.41233	0.146642	0.110075	0.261551	0.000619	0.291045	0.358955	0.000413	0.044909	0.313535	0.056291	0.113204	0.38928	0.670944	0.047185	0.024214	0.034035	0.516708	3.25495
		0.249587	0.123245	0.85095		0.0796862	0.1346	0.25495	0.028166						0.195957	0.49113		1.03342	0.038779		0.27599			0.226898								0.076493	0.097201			0.175373	0.058769		0.100786	0.14404	0.066432	0.595406	0.208609	0.272144	0.055671	0.152732		0.215759	2.26753
		0.0990917	0.171759	0.186003	0.187861	0.0943435	0.126548	0.711015	0.009868	0.076114	0.304662	0.001031	0.060231		0.383457	0.476898		0.362211	0.207921		0.115718			0.243193		0.009488	0.010726					0.02556	0.015858		0.254851	0.163806	0.075746	0.051679	0.184396	0.088576	0.173841	0.347682	0.323675	0.658113	0.433568	0.196192	0.285066	0.207715	3.42492
		0.32019		0.545004	0.348679	0.2564	0.132535	0.430899	0.094984	0.209158	0.311881	0.001031	0.063944		0.717822	0.262376			0.124587		0.127269			0.206271		0.018152	0.013408					0.106903	0.166604		0.108022	0.025933	0.065485	0.043657	0.044081	0.015728	0.14673	0.238204	0.356788	0.800704	0.578228	0.157078	0.170586	0.138201	2.26836
		0.270644		0.160611	0.45768	0.626548	0.157514	0.437706		0.159447	0.244224	0.021452	0.098597		0.648721	0.393771			0.231023							0.064975	0.054868					0.110821	0.390112		0.547015	0.162127	0.018657	0.078918									0.157797	0.262995	2.04703
		0.321016		0.626755	0.0906276	0.654005	0.112923	0.304455	0.087459	0.099629	0.433375	0.00165	0.008251		0.26217	0.572607			0.53486					0.125206		0.003713	0.009695					0.12444	0.299254		0.338246	0.094216	0.182836	0.211567									0.114893	0.736799	3.82405
					0.22564			0.340347	0.116749	0.419967	0.54146	0.019183	0.065182		0.679043	0.008251			0.221328					0.043111		0.155941	0.025784								0.295522			0.122948									0.07797
					0.115813				0.159035	0.227104	0.703589	0.006188	0.123144		0.576114	0.325495			0.218647					0.030322		0.051568	0.028465								0.514179			0.186381									0.104579		0.022071
					0.217589				0.08684	0.257838	0.832096				0.428218	0.19967			0.418523					0.008457											0.612687			0.209142									0.154909		0.00165
					0.216557				0.222566	0.160272	0.450701		0.011345		0.532178	0.310644			0.28816					0.063944											0.3			0.215485									0.093234		0.062294
									0.318894	0.420586	0.659653		0.000413											0.054868																									0.007219
									0.272277	0.288366	0.383045		0.000206																																		0.002269		0.001444
									0.234942	0.19637	0.997318		0.012583																																		0.000619		0.013408
									0.162954	0.139439	0.339728		0.005776																																		0.000413
									0.260107				0.000825																																		0
									0.101691				0.002063																																		0.002269
									0.209365				0.000619																																		0.003919
MFR_week5		0.035979		0.044819		0.246094	0.036595		0.018298						0.001031	0.000206		1.07879	0.15264	0.346947	0.099835	0.193482	0.650784	0.063528				0.356436				0.34736	0.1217			0.407178	0.475866		0.145702	0.029771	0.001972	0.036672	0.01045	0.065852	0.015773	0.10903		2.10396	0.105817
		0.032484		0.347245		0.589021	0.0625		0.016859						0.003713	0.012789		0.9967	0.225041	0.369018	0.132838	0.078795	0.481229	0.288651				0.143564				0.235767	0.215553			0.096328	0.311675		0.255915	0.176459	0.185331	0.000394	0.038644	0.150237	0.061909	0.086751		2.39769	0.457921
		0.02241		0.617393		0.249178	0.087582		0.003906						0.002888	0.000206		2.31621	0.368399	0.177393	0.007632	0.259488	0.538985	0.255345				0.328589				0.143358	0.162335			0.479992	0.873556		0.665221	0.175868	0.051853	0.000986	0.071175	0.157334	0.069401	0.148659		1.53775	0.800743
		0.356908		0.769531		0.49301	0.325658		0.00699						0.000619	0.011757		1.15305	0.806931	0.113036	0.0033	0.079208	0.912129	0.234992				0.447401				1.48597	0.056106			0.014233	0.002475		0.560528	0.024448	0.146688	0	0.028588	0.081625	0.098778	0.112579		1.28445	0.630157
	0		0.692038	0.538651	0.023438	0.049959	0.062294	0.233776	0.037623	0.000825	0.102517	0.056106	0.158622		0.014233	0.003713		1.1908	0.82467	0.072401	0.186262	0.058168	0.380982	0.305921	0.046205	1.08746	0.073432	0.158003	0.083127	0.18915	0.163779	0.003507	0.002888	0.338284	0.000413	0	0.000825	0.096535	0.702879	0.073738	0.032729	0.000197	0.007886	0.227721	0.065457	0.144519	0.033416	1.19348	0.964315
	0.009695		0.455033	0.483141	0.034334	0.059211	0.09889	0.403577	0.00514	0.000206	0.074464	0.201526	0.429455		0.029084	0.003094		1.51609	0.430899	0.051568	0.020008	0.073845	0.298474	0.320929	0.279084	1.52001	0.15264	0.002475	0.082508	0.075908	0.522071	0	0.160685	0.180074	0.005776	0.177393	0.403672	0.074876	0.202287	0.029377	0.000197	0.000197	0.003549	0.069992	0.042981	0.214314	0.032178	0.864893	2.55404
	0.038573		0.586221		0.001439			0.245391		0.00165	0.041048	0.849216	0.204002					1.14377					0.828795		0.17368	1.58045	0.118606	0.051361	0.210809	0.471328	0.459158			0.152434	0.001238			0.114068									0.038779	1.26217
	0.007013	0.234736	0.77599	0.563944	0.011102	0.274959	0.666873	0.88219	0.178837	0.031766	0.02104	0.105404	0.084777		0.854579	0.268358		1.01361	0.271246	0.283003	0.128919	0.197195	0.273927	0.27434	0	0.859736	0.062706	0.049092	0.002269	0.00165	0.639645	1.17488	0.651697	0.265264	0	1.25331	0.515728	0.022896	0.056106	0.302805	0.024134	0.022483	0.551774	0.542492	0.236592	0.03651	0.012376	1.22277	3.88593
	0.00165	0.297649	0.575701	0.704414	0.002467	1.85375	0.580858	0.36486	0.274959	0.004125	0.100041	0.057756	0.257632		0.415017	0.282591		0.69967	0.232673	0.653465	0.21514	0.405734	0.999794	0.270627	0.000825	0.983498	0.064356			0.006807	0.004332	0.214818	0.072641	0.123144	0.002475	0.295944	0.704056	0.000825	0.32302	0.100248	0.035685	0.113655	0.447195	1.68338	0.089728	0.031972	0.008457		6.53053
	0.015677	0.840347	0.988449	0.87665	0.015419	1.65037	0.617574	0.428282	0.079414	0.003713	0.26382	0.094266	0.212046		1.04373	0.171411		0.600866	0.235149	0.806518	0.195338	0.046617	0.400784	1.02496	0.001444	0.433168	0.09179	0.574464	0.172236	0	0.43255	0.712127	0.491515	0.00165	0.000619	0.08423	0.530008	0.008663	0.077558	0.044142	0.037129	0.07797	0.791667	0.414398	0.212459	0.125413	0.034447	1.47	5.90945
		0.207921	0.47071	1.3455		0.756394	0.38387	0.360251	0.09736						0.446988	0.519802		1.16316	0.155116	1.06477	0.202145	0.148309	0.580652	0.511139				0.379332	0.471947			0	0.04553			0.09644	0.098096		0.472772	0.758663	0.225454	0.677805	0.79703	0.606642	0.262995	0.64934		0.922917	3.717
		0.501856	1.08148	0.336221	0.646865	0.601073	0.267327	0.64399	0.007219	0.081674	0.186578	0.026403	0		0.747318	0.641295		0.538573	0.283003	0.183993	0.108911	0.126856	0.258663	0.201939	0.019792	0	0.012083	0.320132	0.057962	0.235149	0.099629	0.015728	0.077194		0.937086	0.300497	0.299876	0.583609	0.900371	0.614068	0.429662	0.582508	0.584158	1.05239	0.843441	0.327145	0.691007	0.714792	4.02434
		0.325701		1.22752	0.452558	0.505569	0.238449	0.553835	0.054043	0.134956	0.393068	0.007013	0		1.44018	0.325908			0.370462	0.426774	0.148927	0.456889		0.217616	0.124583	0	0.002292	0.985767	0.319719	0.101898	0.092822	0.416805	0.09851		0.331747	0.36072	0.366929	0.372517	1.2993	0.320545	0.344678	1.60788	1.22504	1.47133	0.803837	0.584777	0.306518	0.535625	3.21576
		0.27929		0.587871	0.537541	0.456683	0.37335	0.576881		0.179572	0.229351	0.130776	0		0.990924	0.406353			0.450701	0.236592		0.333952			0.00125	0	0.003125	0.626856	0.32137	0.154084	0.59571	0.548634	1.57823		0.366515	0.510555	0.195364	0.185224									0.59179	1.21375	3.48948
		0.216584		0.446576	0.433168	1.79187	0.051774	0.27194	0.064159	0.117625	0.409845	0.020627	0.011345		0.577764	0.545173			0.438944	1.1085	0.852104	0.4967		0.544792	0.009792	0	0.005417	0.892327	0.558993	0.146246	0.459365	0.863204	0.154801		0.942674	0.571192	0.671565	0.482616	0.261964	1.10355	0.715759	1.31353	1.58437	1.05879	0.85066	1.20091	0.176568	1.89542	5.49505
					0.843028			0.371866	0.109145	0.288164	0.412611	0.015264	0.047442		1.18172	0.046411			0.370875	0.632013	0.380982	0.481642		0.180417	0.017708	0	0.102917	0.278259	0.331064	0.485149	1.02372				0.550704			0.567053	0.659241	0.858086	1.56745	1.01733	1.8356	1.25021	0.776403	1.67554	0.472566
					0.259695				0.154499	0.232485	0.850848	0.007426	0.00165		0.843647	0.33519			0.1875	0.444926	0.349422	0.183375		0.009167	0.011875	0.000208	0.125	0.593647	0.470297	0.457715	0.181312				1.05133			0.421772	0.180693	0.395421	1.04414	1.10953	0.604579	0.729992	0.498762	0.608705	0.153053		0.087083
					0.629125				0.11781	0.130347	0.740044				1.26217	0.157797			0.508457	0.155734	0.124794	0.911922		0.013125				0.967409	0.304043	0.51382	0.026403				0.560844			1.23489	0.669348	1.01918	1.13305	1.21782	1.27104	0.522277	0.814769	0.596535	0.389233		0.023125
					0.269596				0.143805	0.162058	0.250184		0		0.701114	0.374381			0.348391	0.157591	0.596741	2.48102		0.470625				1.11695	0.358292	0.195132	0.119224				1.02442			0.473717	0.823845	0.891089	1.67698	1.31786	1.21101	1.40656	0.314975	0.731642	0.102104		0.012708
									0.087574	0.355457	0.835361		0.016859								0.575495			0.338125				0.329208	0.530322	0.077764	0.21019								1.3158	0.834365	1.91997	2.45338	1.41357	1.12046	0.679868	1.18647			0.024792
									0.156527	0.147124	0.5684		0.016653								0.974835							0.523927	0.996493	0.113655	0.253713																0.037292		0.021667
									0.112647	0.107854	0.776364		0.082031								0.352104									0.028465	0.267327																0.014583		0.027917
									0.074484	0.222345	0.351954		0.037829								1.4769									0.446576	0.027228																0.042083
									0.20649				0.007401								0.656147																										0.051458
									0.065634				0.009663								0.659447																										0.013125
									0.204277				0.008018								0.405528																										0.006875
MFR_week6	0.026875	0.114274	0.029167	0.231642	0.001042	0.220091	0.119018	0.604792	0.021246	0.595208	0.927917	3.63437	2.57687		0	0.000623		1.27076	0.118978	1.59295	0.340116	1.72262	0.669819	0.341997	0.018125	0.090833	0.360417	2.57159	0.007708	0.295417	1.08021	0.504332	0.119843	0.296458	0.050833	0.174711	1.08746	0.027708	0.154167	0.008125	0	0.009792	0.005	0.03375	0	0.030417	0.0025	3.19905	0.722772
	0.070833	0.024546	0.323958	0.695957	0.069792	0.220916	0.129125	0.141667	0.067244	0.500417	0.838125	4.59208	2.19771		0	0.031977		1.88055	0.13206	2.59025	0.145349	3.43738	0.265831	0.487005	0.07625	0.048333	1.19271	3.88151	0.12	0.367083	1.92312	0.171205	0.834365	0.6675	0.158333	0.09014	0.300124	0.047292	0.1975	0.164167	0.078958	0.001458	0.006042	0.339167	0.004792	0.008125	0.007292	2.92244	2.84633
	0.109792	0.052599	0.1325	0.183993	0.05875	0.267739	0.22896	0.615833	0.090347	0.683333	2.26229	3.18187	1.72729		0	0.000208		4.02344	0.809593	11.4575	0.256645	12.5476	0.675576	0.355198	0.368333	0.286875	0.712292	10.0096	0.059583	0.455208	1.1675	0.582302	0.377888	0.368958	0.16875	0.280734	1.32405	0.28375	0.29	0.040208	0.013333	0	0.009167	0.130625	0.001042	0.077917	0.315833	1.4177	2.6479
		0.29146		0.917492		0.648309	0.203795		0.000206						0.002076	0.001038		3.1838	0.504983	8.02136	0.227159	4.84393	0.309005	0.146658				11.1715				0.015883	0.043523			0.003919	0.000413		0.27125	0.022292	0.131667	0.000417	0.006667	0.095417	0.010208	0.006875		1.04847	0.78486
	4.62254		1.08251	0.580858	0.014439	0.342822	0.103754	0.228484	0	0.000415	0.106105	0.273515	0.230404		0	0.000208		2.30777	0.469477	1.81974	0.223007	1.50025	0.606086	0.109117	0.168317	1.45359	0.126031	2.30268	1.74497	7.15152	6.68664	0.001031	0.004538	0.477929	0.009282	0.00165	0.02434	0.075908	0.401042	0.003542	0.008542	0	0.000208	0.084167	0.006458	0.034792	0.091997	0.892739	2.08375
	2.39084		0.083746	1.41667	0.0033	0.12005	0.075289	0.639959	0.002063	0	0.101329	0.929662	0.387376		0	0.009759		2.04749	0.309593	1.11444	0.117733	1.55341	2.50843	0.229373	0.63882	2.32653	0.25495	1.79998	2.14477	5.41785	7.39673	0.004332	0.000825	0.42533	0.02104	0.000206	0.009901	0.136139	0.098542	0.007083	0.000208	0	0.002708	0.045208	0.01375	0.04375	0.047236	1.26382	3.26011
	9.08522		0.53816		0.011345			0.840369		0	0.265365	1.03857	0.374587					1.25432					0.041735		0.397277	2.40594	0.410685	1.43345	14.905	11.3458	10.8163			0.294554	0.007426			0.347153									0.043317	1.99319
	10.4197	0.570751	1.78094	0.708952	0.057756	0.622937	0.204002	1.37438	0.284676	0.001661	0.156354	0.336634	0.183787		1.25534	0.27611		2.54174	0.378701	0.000206	4.86591	0.042146	4.22389	0.480198	0.097566	1.52166	0.296205	1.07871	9.53426	17.4983	9.78401	0.581954	0.402318	1.74422	0.000413	0.378518	0.071813	0	0.125413	0.020215	0.000619	0.072401	0.686881	0.772896	0.617368	0.058581	0.207096	1.69431	4.75454
	7.4418	0.344266	1.44555	0.888408	0.023515	1.23804	0.963696	0.794672	0.083264	0.000623	0.402616	1.08643	0.169142		0.947985	0.355674		1.77405	0.120066	1.21196	3.22864	0.434005	0.276727	0.648721	0.027021	2.08024	0.47566			12.3916	6.29126	0.001035	0.041184	0.000206	0.000413	0.343129	0.046772	0.002475	0.161097	0.00887	0.001031	0.166873	0.499794	0.921617	0.222153	0.323845	0.036097		7.89625
	5.92854	0.268771	1.85664	0.34736	0.006601	1.76196	1.75578	0.743443	0.030316	0.017027	0.81686	1.09757	0.45132		0.618215	0.378906		2.0477	0.215666	0.272821	8.96955	0	0.366776	1.78135	0.214728	0.684818	0.341584	0.796464	0.505757	6.95223	3.51498	0.085472	0.303394	0.020833	0.002063	0.603684	0.196192	0.056312	0.026403	0.010726	0.110561	0.047236	0.518564	0.930693	0.454208	0.496287	0.267327	2.57776	6.33395
		1.21885	0.741749	0.678012		1.14233	0.125206	0.696107	0.01495						0.658923	0.832031		2.03228	0.26727	0.728824	9.84074	0.141242	0.055715	1.18585				0.296669	0.988487			0.008071	0.123137			0.164735	0.031043		1.01073	1.19451	1.03837	1.34282	1.63655	1.06064	0.353342	1.17698		1.34983	4.63428
		0.202145	1.12376	0.677599	0.390883	1.33292	0.803218	0.759631	0.039037	0.108811	0.157172	0.182756	0.000623		1.0847	1.10999		1.53762	0.389803	0.448808	2.10327	0.02241	0	0.602723	0.094678	0	0.019596	0.815995	0.121711	0.2794	0.0956	0.008278	0.226821		1.51511	0.735513	0.25952	0.311879	1.58272	1.65697	0.97731	1.28527	1.64129	1.98969	0.594472	0.98783	0.656559	1.40759	5.10252
		0.429249		0.286097	0.795586	1.14356	0.320545	0.787295	0.098422	0.11291	0.093443	0.231848	0.002284		1.98849	0.89597			0.462788	0.103207	2.41257	0.886102		0.674299	0.08684	0.000825	0.030528	1.27364	0.201069	0.144326	0.257607	0.000207	0.003311		1.19764	0.579884	0.027939	0.313121	0.866337	1.63738	0.703383	2.55879	2.013	1.25083	1.31415	1.43833	0.733086	1.02578	3.63634
		0.191419		0.89604	0.915842	0.134282	0.378919	0.567008		0.476639	0.445492	0.306106	0.005191		1.2243	0.669819			0.619243	0.004523		0.037418			0.043111	0	0.108705	0.450863	0.052426	0.154194	0.401316	0.010141	0.436672		0.500207	1.03849	0.110306	0.149007									0.651609	1.19555	3.8521
		0.376031		0.299299	0.567038	0.888408	0.030116	0.152254	0.059836	0.437705	0.739344	0.02599	0		0.915296	0.383429			0.619655	0.081003	1.56784	0.1544		0.816007	0.147277	0.000206	0.053218	0.741365	0.43051	0.14926	0.872533	0.078228	0.004553		1.15046	0.349545	0.041598	0.402732	0.539679	2.33429	0.557155	1.14186	2.73211	1.31332	1.48191	2.96361	0.314769	3.05796	7.87747
					0.941625			0.482787	0.189139	0.477049	1.02234	0.03321	0.131022		1.49321	0.350329			0.571546	0.046464	0.732319	0.152138		0.241749	0.035066	0	0.08849	0.449424	0.762541	0.429276	1.10629				0.394661			0.506416	1.03618	1.68832	1.71341	1.97615	2.78557	1.64494	1.64679	3.53988	0.608292
					0.870462				0.098156	0.433607	1.22848	0.003094	0.002284		1	0.506168			0.217928	0.072574	0.781456	0.293586		0.01712	0.069926	0.018564	0.04703	0.945313	0.920436	0.334087	0.348684				0.786838			0.520695	0.459087	1.0882	0.966488	0.63713	0.684622	0.814556	0.637747	1.58655	0.475454		0.497112
					0.599422				0.297746	0.334836	0.4125				1.70806	0.247533			0.724507	0.000411	0.182771	0.011719		0.023309				1.21217	0.945724	0.5	0.137747				1.08133			1.17446	1.17866	2.26912	1.25247	1.52344	1.80284	1.33553	1.37541	1.51316	0.617574		0.307343
					1.09344				0.148361	0.533197	0.58873		0.0033		0.72574	0.61801			0.350123	0.002878	0.245477	0.636513		0.240305				1.706	1.10054	0.373561	0.166941				1.79512			0.984892	1.36205	2.13631	2.90769	1.81579	2.04914	2.67763	0.514391	0.978824	0.096122		0.181312
									0.209631	0.463115	0.795697		0.104167								0.080798			0.324051				0.154605	0.869243	0.557771	0.296258								2.17455	2.06723	2.92044	2.47841	2.56414	2.67887	1.55839	2.74959			0.052805
									0.260656	0.328279	0.908811		0.014645								0.605674							0.909128	1.52015	0.148438	0.774671																0.156147		0.308375
									0.351639	0.398156	0.206352		0.0033								0.736225									0.194696	0.684622																0.079827		0.139026
									0.156352	0.446721	0.193033		0.200289								0.612459									1.00699	0.071135																0.040635
									0.207582				0.011139								0.391036																										0.009488
									0.134221				0.010726								0.009046																										0.077764
									0.160656				0.16646								0.652755																										0.142946
MFR_week7		0.067038		0.506807		0.561469	0.253507		0.057962						0.000619	0.000413		1.34942	0.127682	0.252888	0.615099	0.445751	1.44802	0.554662				0.372937				0.027318	0.05981			0.069536	0.192467		0.179276	0.007607	0.001234	0.002878	0.002878	0.016653	0.000206	0.034745		2.40903	0.687086
		0.11283		1.26361		0.042285	0.122731		0.103135						0	0.023721		1.95937	0.203795	0.525784	0.23288	0.304455	1.37108	0.268358				0.215965				0.005588	0.967922			0.295323	0.561672		0.293791	0.197574	0.145148	0.012747	0.052837	0.454359	0.001028	0.016447		3.99608	3.92281
		0.010107		0.57797		0.881601	0.632219		0.043523						0	0.001238		3.7731	0.247937	0.487624	0.578177	0.659241	1.61654	0.657384				0.446782				0.025662	0.183982			0.321813	1.26676		0.211554	0.102796	0.012952	0.009457	0.006785	0.255962	0.016242	0.07463		1.50351	5.35844
		0.301155		1.06374		0.964728	0.298474		0.029703						0	0.084777		1.96906	0.574051	0.053837	0.200083	0.10953	0.620256	1.18255				0.437087				0.030422	0.000621			0	0.000621		0.228002	0.00884	0.092105	0.001028	0.001028	0.458882	0.006579	0.055715		1.5526	1.76573
	0.005363		2.20282	1.13717	0.003919	0.719884	0.33684	0.019389	0.110561	0	0.223185	0.435224	0.349338		0	0.034447		2.36097	0.239068	0.390883	0.126238	0.002063	1.11675	1.18915	0.040149	1.29677	0.160803	0.063531	0.003713	0.062706	0.011964	0.011382	0.000828	1.113	0.001656	0.002276	0.001035	0.108444	0.490954	0.00514	0.013363	0.000617	0	0.090872	0.166735	0.050164	0.245447	1.19823	1.98593
	0.136757		0.127276	1.81044	0	0.354992	0.39047	0.640264	0.159653	0.071576	0.186469	1.10782	0.288907		0	0.007219		2.29724	0.239274	0.000825	0.089728	0	0.941007	0.959365	0.678187	1.52049	0.253311	0.000825	0.130363	0.019802	0.120875	0	0.001035	0.391763	0.003725	0.000414	3.22579	0.039321	0.165296	0.059622	0	0	0.007401	0.018298	0.002673	0.019531	0.083402	1.25763	2.54449
	0.14212		1.32078		0.051155			0.056724		0.000206	0.221535	2.10637	0.380381					1.83601					0.268771		0.496275	2.2858	0.51221	0.036922	0.287954	0.164398	0.097153			0.820571	0.001656			0.038493									0.060224	2.41007
	0.081683	0.349338	0.725579	0.321399	0.108498	1.23676	0.249586	0.783416	0.187087	0.000206	0.204002	0.25	0.206333		1.29889	0.230611		2.49876	0.458127	0	0.511757	0.009488	0.122112	0.752276	0.018005	1.30422	0.260762	0.000413	0.623144	1.03073	0.069101	0.479795	0.580993	0.151697	0.015522	0.796404	0.49024	0	0.178012	0.056312	0	0.096535	0.636757	1.65924	1.01031	0.976073	0.164735	1.55466	3.76568
	0.018771	0.375414	1.90087	2.04532	0.101279	1.26925	0.987997	0.079208	0.099629	0.030116	0.376856	1.20737	0.126035		0.858705	0.091584		2.10726	0.138614	2.45771	0.377475	0.282178	0.656559	0.971854	0.047599	1.90315	0.710265			0.020008	0.089315	0.000171	0.000342	0.007864	0	0.039897	0.167123	0.085472	0.002888	0.039604	0.005982	0.07962	1.22978	2.15305	0.223185	0.636139	0.126863		4.70751
	0.01052	0.301325	0.795944	0.152939	0.032178	3.5447	0.700538	0.639645	0.267533	0.014026	0.378713	0.255174	0.368171		2.25041	0.234736		2.50041	0.448432	0.817863	0.471741	0.018152	0.072607	1.9911	0.425911	0.934396	0.235099	1.53073	0.667492	0.033622	0.064769	0.005822	0.223288	0.000828	0.01221	0.044178	0.10274	0.054843	0.233498	0.008457	0.01052	0.045173	1.3783	1.74938	0.561675	1.37459	0.311879	3.60534	8.4375
		0.307947	2.08651	0.518005		1.61796	0.440604	0.384695	0.003094						0.679043	1.03713		1.3356	0.390677	1.62067	0.168729	0.415429	0.266089	0.812707				0.586221	1.01134			0.004795	0.068151			0.2125	0.003938		1.87356	1.99629	2.58705	2.85788	2.44307	1.5755	0.516089	2.57694		2.75062	4.71349
		0.40356	2.2291	0.53601	0.211507	1.80008	0.566225	0.311675	0.055693	0.156559	0	0.005381	0.062087		1.53032	1.30611		2.05776	0.645421	0.232467	0.121081	0.029084	0.006188	1.07409	0.005588	0	0.028146	0.896658	0.160685	0.316832	0.151815	0.022432	0.100171		1.69777	0.185959	0.045548	0.744692	2.73102	3.68317	3.2863	2.12974	2.86902	2.80239	1.44121	1.55714	0.802805	2.40687	6.48948
		0.192674		0.382864	1.31788	1.24897	0.190397	0.303218	0.043729	0.058581	0.008251	0.019661	0.0033		2.12479	1.32715			0.494224	1.05095	0.047855	0.981229		0.540977	0.081333	0	0.21668	1.09942	0.298061	0.178218	0.121081	0.065411	0		0.332534	0.645719	0.008048	0.200171	1.43667	3.53424	1.9804	3.01898	2.99278	4.86613	2.38511	3.85685	1.37789	2.56271	5.76114
		0.1875		0.530836	1.83796	0.214197	0.537873	0.328177		0.364274	0.001238	0.009106	0.005982		2.19018	0.537748			0.60066	0.004538		0.034447			0.063328	0	0.104512	0.296823	0.292904	0.235355	0.655941	0.469178	0.33476		0.213185	0.975514	0.072089	0.234075									0.797442	3.16329	6.09158
		0.171978		0.57947	1.30381	1.66039	0.231374	0.023309	0.090965	0.347566	0.011345	0.096647	0.008045		1.49319	0.8717			0.72071	0.896452	1.08478	0.264645		0.798634	0.096233	0.001035	0.07202	0.820338	0.54146	0.54868	0.557962	0.076027	0.000171		0.68339	1.2488	0.088527	0.263356	0.55755	1.41295	0.242162	0.944101	1.77908	1.12748	0.997937	2.92059	0.404084	5.09685	10.1316
					1.3214			0.088078	0.106023	0.723804	0.071988	0.204884	0.131394		2.19101	0.580033			0.668729	0.049299	0.663366	0.190594		0.203849	0.011796	0.000207	0.173427	0.760726	0.503919	0.365099	0.846328				0.277226			0.293151	1.18296	1.94513	0.744018	0.620256	2.87418	1.7632	1.85602	2.62686	0.92038
					0.959437				0.16151	0.462871	0.22401	0.00207	0.026609		1.33808	0.911304			0.087665	0.311056	0.902434	0.112624		0.043253	0.123965	0.005381	0.525455	1.50371	0.749794	0.365099	0.257426				0.380308			1.20976	1.00578	0.652021	0.21679	0.394802	0.570545	0.785272	0.594472	1.55116	0.498969		1.29181
					0.567467				0.17203	0.330858	0.001031				1.55219	0.288366			0.502682	0	0.042492	0.396658		0.139073				1.81394	0.909653	0.554455	0.295792				1.07106			1.55274	1.11386	1.62273	1.0526	1.75041	1.74732	1.54394	1.02908	1.33395	1.00371		0.74255
					1.00993				0.147071	0.726898	0.010726		0.027021		1.97442	0.85396			0.447814	0.015058	0.878094	1.88717		0.384106				1.49134	0.837871	0.554868	0.212665				1.31849			1.29606	1.36056	1.76526	2.4243	3.15285	1.92925	3.21493	0.351691	0.636757	0.256394		0.974545
									0.148515	0.462046	0		0.114893								0.072814			0.299048				0.455652	0.536097	0.258457	0.55755								1.99773	1.29476	2.00289	2.4144	2.26114	2.08828	0.855198	2.28156			0.466887
									0.128507	0.207715	0.001031		0.201733								1.04435							0.825083	1.0229	0.643358	0.841584																0.652318		1.00559
									0.185025	0.113243	0.000825		0.10231								1.03342									0.228548	0.157178																0.198882		0.582988
									0.12335	0.248556	0.00887		0.111386								0.994843									0.739893	0.018564																0.210679
									0.158828				0.009901								1.10107																										0.097889
									0.005569				0.024546								0.408622																										0.327401
									0.148927				0.064356								0.947195																										0.49731
MFR_week8		0.14363		0.342949		0.521635	0.248798		0.154848						0.000206	0.000619		1.57426	0.157178	0.399038	0.98288	0.427484	0.419761	0.724159				0.522636				1.0231	0.258457			0.018977	0.531353		0.203074	0.001639	0.015574	0.000205	0.000205	0.035451	0	0.039139			0.515058
		0.116987		0.778846		0.063101	0.234575		0.063702						0	0.067244		1.47752	0.183993	0.476362	0.648515	0.501402	0.033622	0.319311				0.139022				0.383251	0.862417			0.517946	0.705033		0.390779	0.088525	0.051844	0	0.003074	0.178689	0.002254	0.012705			2.05425
		0.156851		1.32191		0.825721	0.579327		0.009215						0	0.016914		4.50887	0.1283	0.549679	0.780734	0.648037	0.066419	0.32492				0.328926				1.05445	0.726279			0.312087	1.06807		0.312705	0.014344	0.026844	0.000205	0.001639	0.154713	0.004303	0.054713			3.38078
		0.074519		1.17849		0.910657	0.36879		0.002003						0	0.09571		2.15553	0.377475	0.06851	0.383457	0.108373	0.101279	0.612981				0.361579				0.402228	0.320957			0.261345	0.009282		0.345697	0.002664	0.07459	0	0.018852	0.298566	0.002869	0.012705			0.276609
	0.067308		1.36728	1.14784	0.001603	0.99379	0.353966	0.01547	0.107572	0.000206	0.1842	0.757426	0.177599		0	0.23618		3.69946	0.156766	0.481771	0.251031	0.061298	0.089315	0.871995	0.027434	1.36592	0.5	0.138421	0.001202	0.019231	0.113381	0.111799	0.062913	0.606848	0.003713	0	0.009901	0.339315	0.452459	0	0.001844	0	0	0.185861	0.023156	0.030533	0.307962		1.31436
	0.180288		0.016447	1.92248	0.001002	0.459535	0.467147	0.106642	0.201122	0	0.420173	0.919761	0.598391		0	0.000206		1.51217	0.058993	0.403245	0.349835	0.001202	0.170586	1.0006	0.305899	0.713078	0.307756	0.171474	0.082131	0.264423	0.051082	0.016502	0.28486	0.423474	0	0.00165	0.001444	0.411716	0.051434	0.002664	0.022746	0	0	0.009631	0.002049	0.014344	0.266295		3.50351
	0.133013		0.702946		0.04988			0.059818		0	0.479579	1.19575	0.658828					3.26629					0.030941		0.3092	0.895421	0.282591	0.033454	0.372796	0.170072	0.124599			1.27517	0.291048			0.191419									0.179868
	0.029447	0.140017	0.220967	0.086814	0.05629	0.679348	0.241276	0.051774	0.5625	0	0.244224	0.031147	0.306312		0.81085	0.367781		3.75351	0.590553	0.118399	0.542268	0	0.13717	0.838903	0.002269	1.20008	0.121493	0	0.0002	0.242388	0.069912	0.636005	0.256852	0.630363	0.017946	0.540698	0.238164	0.12995	0.184856	0.101775	0.01435	0.050415	0.700151	2.06023	0.633308	0.243391	0.001444
	0.0002	0.262586	0.525029	0.751144	0.077724	0.35512	0.718965	0.084365	0.101073	0.092203	0.390058	0.320957	0.082302		0.4375	0.17863		3.91192	0.029497	0.25887	0.371595	0.000825	0.448845	1.65367	0.011757	3.0592	1.0658			0.002604	0.099359	0.000623	0.015365	0.378094	0.016502	0.175664	0.183347	0.030322	0.14256	0.053059	0.006231	0.067598	0.859139	3.68599	0.061934	0.264539	0.000206
	0.001603	0.080378	0.703375	0.169479	0.060296	0.544908	0.114846	0.075083	0.306724	0	0.907797	0.2533	0.200083		1.51588	0.194307		5.28073	0.100248	0.200495	0.478766	0.000206	0.113036	1.67409	0.39047	1.0297	0.25495	0.728754	0.579414	0.178486	0.035857	0.008721	0.30191	0.053424	0	0.332018	0.373339	0	0.000755	0.026246	0.106495	0.017183	0.790408	0.875378	0.549094	0.890106	0.023515	2.66175
		0.063072	0.680921	0.33238		0.709096	0.269594	0.085809	0.044348						0.933581	0.789604		1.23185	0.260726	0.113243	0.057492	0.022071	0.068482	0.864893				0.497525	0.772483			0	0.03613			1.46242	0.020349		3.22375	2.73584	4.9003	1.56835	3.28172	1.79418	0.902379	3.13708		1.98194
		0.077374	0.130578	0.126859	0.479691	0.290904	0.279605	0.161716	0.142739	0.164604	0.04703	0.121287	0.147483		1.30177	0.324257		2.74422	0.243606	0.111799	0.002204	0.015883	0	1.47834		0.006229	0.047965	0.233705	0.002682	0.267946	0.049505	0.01059	0.086171		1.43895	0.251453	0.049211	0.721346	2.85499	4.31646	6.91635	1.19146	4.52436	4.89275	1.31628	2.38595		2.14888
		0.086241		0.081522	0.726259	0.224828	0.161184	0.044554	0.185437	0.457302	0.137583	0.258251	0.001444		1.3222	1.26526			0.272071	0.112417	0.035857	0.04703		0.786716		0	0.740864	0.593647	0.19245	0.241749	0.148721	0.15843	0		0.322882	0.999585	0.001869	0.225914	2.61707	6.17391	3.5608	2.25642	3.75604	3.93807	3.19203	4.00453		1.85154
		0.060355		0.132151	1.28318	0.146167	0.133438	0.040635		0.923474	0.041254	0.308375	0.024546		1.85953	0.995875			0.400165	0.004744		0.001238				0.017442	0.196013	0.069513	0.117987	0.238861	0.513614	0.144518	0.459925		0.379568	0.793812	0.126246	1.40386										2.5679
		0.039474		0.06722	1.374	0.721825	0.037614	0.017739	0.095297	0.594472	0.321163	0.578589	0.005982		0.94637	1.13016			0.490305	0.234942	0.058168	0.011964		0.755606		0.003738	0.184593	0.784653	0.387789	0.528878	0.699257	0.194352	0.082018		1.47155	2.56624	0.089078	1.05336	0.129886	0.483713	0.213151	0.253664	0.163884	0.190961	1.5908	1.98351		3.0353
					0.510584			0.027228	0.120462	1.16378	0.226898	0.136551	0.297649		1.9571	0.09901			0.599835	0.165223	0.500413	0.178218		0.259136		0.089493	0.223837	1.34282	0.593441	0.724422	0.946988				0.114826			0.927118	0.976384	1.12765	0.511401	0.176914	3.07736	0.04886	1.25326	2.54845
					0.719251				0.096947	1.0889	0.187087	0.354167	0.056106		1.70524	0.467409			0.101279	0.060231	0.473391	0.014851		0.112542		0.003738	0.76848	1.59365	0.688944	0.378919	0.115099				0.262458			1.07434	0.307818	0.802524	0.114007	0.224349	0.319015	0.384161	0.463151	1.44239			1.62022
					0.063215				0.141089	0.494843	0.049505				1.37974	0.203383			0.202145	0	0.000206	0.119637		0.051287		0.012874		1.61881	1.30219	0.80755	0.152228				1.29921			1.32039	0.624389	0.403909	0.569015	1.12011	0.896783	1.58469	0.361156	0.58184			0.438123
					0.328947				0.129332	0.82797	0.115099		0.003205		1.27351	0.503919			0.522277	0.031559	0.058375	0.882426		0.662791		0.018895		1.34241	0.382426	0.465965	0.163573				1.56458			1.36773	0.730456	0.563925	1.92345	1.98392	1.96193	2.92182	0.427321	0.467427			1.09157
									0.101073	0.777434	0.210396		0.348157								0.006807			0.343439		0.002907		0.313738	0.555693	0.578589	0.212459								1.37337	0.720277	1.80741	1.67915	1.64678	1.82085	0.634976	1.36421			0.866279
									0.099629	0.58684	0.176568		0.439103								0.60788					0.00706		0.143564	1.18667	0.090553	0.598391																0.859842		1.27595
									0.27269	0.436469	0.056724		0.270833								1.03465					0.040282				0.246287	0.150165																0.403239		0.957641
									0.019802	0.669554	0.034447		0.223558								0.052186					0.001038				1.17347	0.017533																0.604028
									0.374381				0.023838								0.542079																										0.215324
									0.056518				0.11859								0.30755																										0.800664
									0.264439				0.08113								0.690594																										0.987957
