# Supplementary material for: CNTN5-/+or EHMT2-/+human iPSC-derived neurons from individuals with autism develop hyperactive neuronal networks
Source: eLife. 2019 Feb 12;8:e40092. doi: 10.7554/eLife.40092 (PMC6372285; doi:10.7554/eLife.40092)
Supplement: Figure 6—figure supplement 2—source data 1. [file elife-40092-fig6-figsupp2-data1.xlsx]

## Sheet: Intrinsic
19-2-EHMT2
Trace	DIV	spiking	C (pF)	Ra (MΩ)	Vm	junction potential (mV)	RMP	Rheo (pA)	V (mV)		junction potential (mV)	AP thresh (mV)		AP amp (mV)	AP 1/2 width (msec)	AP 1/2 width (msec)	ΔV (mV)	I (nA)	Resistance (MΩ)	time to first AP (s)	AP freq (@5 pA)	AP freq (@10pA)	AP freq (@15pA)	AP freq (@20pA)	AP freq (@25pA)	AP freq (@30pA)	AP freq (@35pA)	AP freq (@40pA)	45	50	55	60	70	80	90	100
2018_02_21_000	20	yes	30.39	12.8	-40.2914	-10	-50.2914	50	-32.35		-10	-42.35		75.94	1.7	3.7	-5.19567	-0.01	519.567		0	0	1	1	5	8	12	13	14	16
2018_02_21_006	20	no	21.44	9.86	-46.3212	-10	-56.3212	60	-27.83		-10	-37.83		69.1	1.6	4.3	-11.7201	-0.01	1172.01		1	3	6	8	9	11	13	13	16	16
2018_02_21_011	20		35.11	11.5	-42.3573	-10	-52.3573	55	-28.75		-10	-38.75		77.21	2.1	5	-5.40127	-0.01	540.127		0	0	0	0	0	3	4	9	10	12
2018_02_23_000	22		40.9	9.97	-63.1058	-10	-73.1058	50	-35.13		-10	-45.13		79.65	1.7	4.1	-3.63357	-0.01	363.357		0	0	0	0	0	1	1	2	3	4
2018_02_23_005	22		31.64	16.8	-40.7082	-10	-50.7082	35	-29.05		-10	-39.05		71.11	1.6	3.8	-5.55598	-0.01	555.598		1	0	0	4	5	8	10	13	13	15
2018_02_23_012	22		43.94	11.7	-69.8594	-10	-79.8594	75	-30.64		-10	-40.64		76.59	1.5	3.1	-3.64176	-0.01	364.176		0	0	0	0	0	0	3	6	7	9
2018_02_23_018	22		33.14	10.8	-67.6508	-10	-77.6508	35	-26.53		-10	-36.53		68.98	1.4	3.1	-11.9269	-0.01	1192.69		0	0	2	3	5	5	8	8	9	10
2018_02_23_023	22		33.72	11.5	-42.1646	-10	-52.1646	65	-28.77		-10	-38.77		70.03	1.7	3.5	-2.34698	-0.01	234.698		0	0	0	0	0	1	1	2	5	6
2018_02_26_033	25		31.38	18.7	-65.6539	-10	-75.6539	45	-31.31		-10	-41.31		56.88	2.1	4.3	-7.61911	-0.01	761.911		0	0	6	10	11	13	15	16	18	19
2018_02_26_042	25		56.96	26.3	-65.9767	-10	-75.9767	50	-35.58		-10	-45.58		75.61	1.5	3.3	-3.33086	-0.01	333.086		0	0	0	1	5	6	8	10	11	12
2018_04_03_000	21	yes	28.48	9.2	-34.9796	-10	-44.9796	40	-29.51		-10	-39.51		65.37	2.3	4.4	-16.0651	-0.01	1606.51		0	8	7	10	12	13	14	14	15	16
2018_04_03_005	21	yes	27.17	13.6	-42.3727	-10	-52.3727	30	-22.54		-10	-32.54		68.9	1.7	3.9	-28.454	-0.01	2845.4		5	8	10	12	12	13	13	13	14	13
2018_04_03_011	21	yes	27.96	16.7	-39.5817	-10	-49.5817	45	-21.96		-10	-31.96		59.92	2	4.3	-13.0836	-0.01	1308.36		0	5	8	8	7	4	6	4	3	3
2018_04_05_001	23	no	25.72	29	-56.1306	-10	-66.1306	40	-30.57		-10	-40.57		55.42	2	4.5	-15.1027	-0.01	1510.27		1	3	5	6	6	7	7	8	6	4
2018_04_05_005	23	yes	28.37	8.95	-33.0092	-10	-43.0092	45	-16.11		-10	-26.11		57.68	1.8	4.6	-13.9839	-0.01	1398.39		0	0	0	2	2	3	0	3	3	2
2018_04_09_001	27	no	36.1	22.6	-56.0066	-10	-66.0066	45	-30.57		-10	-40.57		76.34	1.8	3.7	-7.24859	-0.01	724.859		0	0	0	3	8	11	11	12	13	15
2018_04_09_007	27	no	39.64	11.8	-51.3182	-10	-61.3182	50	-25.4		-10	-35.4		71.7	1.8	3.6	-9.77518	-0.01	977.518		n/a	n/a	n/a	n/a	n/a	n/a	n/a	n/a	n/a	n/a
2018_04_09_016	27	no	50.59	32.9	-57.5398	-10	-67.5398	40	-28.38		-10	-38.38		67.85	2.1	4.4	-6.78198	-0.01	678.198		0	2	6	7	9	9	10	11	12	12
			34.5917	15.8156	-50.8349	-10	-60.8349	47.5	-28.3878	#DIV/0!	-10	-38.3878	#DIV/0!	69.1267	1.8	3.97778	-9.49263	-0.01	949.263	#DIV/0!	0.470588
19-2
Trace	DIV	spiking	C (pF)	Ra (MΩ)	Vm	junction potential (mV)	RMP	Rheo (pA)	V (mV)	kink	junction potential (mV)	AP thresh (mV)		AP amp (mV)	AP 1/2 width (msec)	AP 1/2 width (msec)	ΔV (mV)	I (nA)	Resistance (MΩ)	time to first AP (s)	AP freq (@5 pA)	AP freq (@10pA)	AP freq (@15pA)	AP freq (@20pA)	AP freq (@25pA)	AP freq (@30pA)	AP freq (@35pA)	AP freq (@40pA)	45	50	55	60	70	80	90	100
2018_02_26_028	20	no	14.84	28.5	-47.9862	-10	-57.9862	25	-30.18		-10	-30.37		65.49	1.6	3.2	-19.9217	-0.01	1992.17		4	8	11	13	15	15	16	16	14	12
2018_02_28_000	22	no	26.42	21.7	-61.2179	-10	-71.2179	35	-29.15	yes	-10	-39.15		75.88	1.6	3.3	-8.82723	-0.01	882.723		0	3	9	11	13	11	8	6	11	6
2018_02_28_010	22	no	13.37	15.4	-58.6525	-10	-68.6525	35	-20.69	no	-10	-30.69		49.29	2.8	3.8	-19.5974	-0.01	1959.74		2	4	4	3	2	2	2	2	2	2
2018_02_28_016	22	yes	17.32	12.3	-42.5489	-10	-52.5489	20	-30.64		-10	-40.64		79.86	1.8	4.1	-20.6784	-0.01	2067.84		7	11	14	16	19	20	22	22	23	23
2018_03_01_000	23	no	26.51	45.6	-48.8578	-10	-58.8578	20	-29.87		-10	-39.87		59.96	2.9	5.6	-27.5211	-0.01	2752.11		5	6	8	9	11	11	12	11	4	4
2018_03_01_005	23	no	22.55	9.94	-42.2156	-10	-52.2156	30	-26.46		-10	-36.46		69.73	2.1	4.9	-20.1858	-0.01	2018.58		3	4	5	6	7	8	9	10	10	10
2018_03_01_013	23	no	21.01	15.5	-54.4336	-10	-64.4336	25	-34.08	yes	-10	-44.08		65.42	2.7	6	-14.7333	-0.01	1473.33		0	4	6	6	7	8	9	9	9	11
2018_03_01_018	23	no	27.36	18.8	-62.1534	-10	-72.1534	25	-32.28	no	-10	-42.28		65.99	1.5	3.1	-11.783	-0.01	1178.3		4	9	11	13	14	14	7	4	4	4
2018_03_01_026	23	yes	25.89	23.2	-28.1114	-10	-38.1114	35	-33.78		-10	-43.78		62.68	2	4.3	-8.58109	-0.01	858.109		0	0	0	1	0	3	7	0.8	7	10
2018_03_05_000	27	no	34.79	15.3	-46.1873	-10	-56.1873	25	-34.76		-10	-44.76		73.82	2.3	4.9	-11.5806	-0.01	1158.06		0	3	5	7	5	9	7	11	10	12
2018_03_05_006	27	no	39.23	23.9	-57.6701	-10	-67.6701	30	-32.2		-10	-42.2		73.61	1.7	3.7	-8.87526	-0.01	887.526		0	4	6	9	11	11	12	13	14	15
2018_03_05_012	27	no	15.95	37.2	-40.0747	-10	-50.0747	25	-27.45		-10	-37.45		52.05	2.6	5.2	-16.2539	-0.01	1625.39		2	2	2	2	2	2	2	2	2	2
2018_03_05_019	27	no	29.24	11.4	-66.0151	-10	-76.0151	25	-35.42		-10	-45.42		79.48	2	3	-7.92921	-0.01	792.921		0	3	8	12	14	14	15	15	16	17
2018_03_05_024	27	no	28.27	21.4	-65.4531	-10	-75.4531	50	-35.02		-10	-45.02		67.3	2.3	5.4	-6.5093	-0.01	650.93		0	0	0	2	2	3	4	3	5	6
2018_03_05_030	27	yes	46.6	16.4	-49.7576	-10	-59.7576	30	-28.2		-10	-38.2		69.69	1.9	4.1	-8.92833	-0.01	892.833		0	0	6	7	7	8	8	10	10	12
2018_04_02_000	20	yes	16.57	7.77	-38.166	-10	-48.166	35	-29.17		-10	-39.17		72.05	1.6	4.1	-6.12851	-0.01	612.851		0	0	0	0	2	0	0	7	10	11
2018_04_02_008	20	yes	24.8	9.01	-37.2397	-10	-47.2397	40	-30.85		-10	-40.85		63.36	2.1	4.9	-13.0138	-0.01	1301.38		0	0	4	6	7	10	11	12	13	6
2018_04_02_014	20	yes	26.89	22	-44.947	-10	-54.947	25	-31.84		-10	-41.84		80.57	1.8	4.2	-15.5783	-0.01	1557.83		4	10	12	13	16	17	17	18	19	20
2018_04_03_054	21	yes	23.23	14.4	-50.8776	-10	-60.8776	20	-32.36		-10	-42.36		71.55	1.7	3.8	-24.3395	-0.01	2433.95		3	6	9	12	13	15	16	16	16	18
2018_04_03_059	21	yes	14.67	21.6	-58.3991	-10	-68.3991	30	-28.49		-10	-38.49		52.96	1.6	3.9	-39.671	-0.01	3967.1		5	9	12	14	15	15	12	10	5	5
2018_04_05_030	23	yes	24.41	37.8	-45.9628	-10	-55.9628	25	-28.5		-10	-38.5		62.31	1.6	3.3	-16.0028	-0.01	1600.28		0	7	9	11	11	13	13	14	15	14
2018_04_05_038	23	no	46.6	28.8	-57.6993	-10	-67.6993	65	-31.8		-10	-41.8		62.77	1.9	3.9	-3.37074	-0.01	337.074		0	0	1	0	1	2	1	3	5	7
2018_04_05_044	23	yes	21.7	19.5	-43.3252	-10	-53.3252	30	-27.73		-10	-37.73		66.19	2	4.1	-20.8346	-0.01	2083.46		5	8	11	12	12	13	14	15	15	12
average	23		25.5748	20.7574			-59.911					-40.0483		67.0439	2.00435	4.2087			1525.41		1.91304	4.3913	6.65217	8.04348	8.95652	9.73913	9.73913	9.9913	10.3913	10.3913

## Sheet: sEPSC
19-2 (ehmt and cntp5)
Trace	DIV	capacitance	Ra	events	Event frequency (Hz)	Peak Amplitude
2018_02_26_032	20	14.84	28.5	17	0.119	-21.482
2018_02_28_004	22	26.42	21.7	185	3.158	-20.74
2018_02_28_015	22	13.37	15.4	9	0.05	-9.29
2018_02_28_021	22	17.32	12.3	25	0.439	-16.11
2018_03_01_004	23	26.51	45.6	6	0.31	-6.79
2018_03_01_010	23	22.55	9.94	5	0.09	-15.78
2018_03_01_017	23	21.01	15.5	4	0.06	-8.45
2018_03_01_022	23	27.36	18.8	27	0.67	-27.2
2018_03_01_033	23	25.89	23.2	69	1.2	-22.89
2018_03_05_005	27	34.79	15.3	76	1.285	-38.995
2018_03_05_010	27	39.23	23.9	159	2.677	-29.33
2018_03_05_018	27	15.95	37.2	8	0.13	-18.72
2018_03_05_023	27	29.24	11.4	4	0.119	-19.16
2018_03_05_029	27	28.27	21.4	18	0.299	-52.61
2018_03_05_034	27	46.6	16.4	71	1.27	-46.46
2018_04_02_007	20	16.57	7.77	189	3.22	-44.72
2018_04_02_012	20	24.8	9.01	137	2.33	-31.58
2018_04_02_020	20	26.89	22	264	4.43	-25.385
2018_04_03_058	21	23.23	14.4	111	1.87	-26.51
2018_04_03_071	21	14.67	21.6	4	0.165	-6.096
2018_04_05_036	23	24.41	37.8	3	0.037	-16.69
2018_04_05_042	23	23.23	33	575	9.67	-36.73
2018_04_05_048	23	46.6	28.8	16	0.268	-20.813
	24.9623	25.6413	18.4354	165.216	1.83693	-24.1776
EHMT2
Trace	DIV	capacitance	Ra	events	Event frequency (Hz)	Peak Amplitude
2018_02_21_005	20	30.39	12.8	58	1.067	-21.39
2018_02_21_010	20	21.44	9.86	15	0.286	-28.22
2018_02_21_016	20	35.11	11.5	41	0.7	-28.69
2018_02_23_004	22	40.9	9.97	80	1.384	-70.96
2018_02_23_011	22	31.64	16.8	207	3.5	-50.21
2018_02_23_017	22	43.94	11.7	85	1.577	-79.93
2018_02_23_022	22	33.14	10.8	9	0.18	-27.986
2018_02_23_027	22	33.72	11.5	0	0	0
2018_02_26_041	25	31.38	18.7	69	1.125	-23.33
2018_02_26_046	25	56.96	26.3	10	0.08	-27.83
2018_04_03_004	21	28.48	9.2	101	1.7	-26.44
2018_04_03_010	21	27.17	13.6	6	0.09	-57.57
2018_04_03_017	21	27.96	16.7	40	0.71	-34.81
2018_04_05_004	23	25.72	29	30	0.147	-12.44
2018_04_05_018	23	28.37	8.95	9	0.16	-19.53
2018_04_09_001	27	36.1	22.6	189	3.36	-15.8
2018_04_09_015	27	39.64	11.8	0	0	0
2018_04_09_020	27	50.59	32.9	27	0.287	-10.36
	23	35.1516	16.2832	52.2727	0.856	-30.5478
