# Supplementary material for: CNTN5-/+or EHMT2-/+human iPSC-derived neurons from individuals with autism develop hyperactive neuronal networks
Source: eLife. 2019 Feb 12;8:e40092. doi: 10.7554/eLife.40092 (PMC6372285; doi:10.7554/eLife.40092)
Supplement: Supplementary file 1. [file elife-40092-supp1.xlsx]

## Sheet: CCRM
Family ID	MSSNG ID	Status	Primary genetic variant(s)					Other ASD implicated variants
			Description	Type	Inheritance	Coordinates (hg19)	Isoform and amino acid change	Description	Type	Inheritance	Coordinates	Isoform and amino acid change
ASD Candidate Gene - CNVs
A	1-0019-002	Unaffected father	Family and study control	---	---	---	---	---	---	---	---	---
	1-0019-004	Proband	16p11.2 deletion/+	Deletion	de novo	chr16:29584000-30200000del	---	---	---	---	---	---
B	3-0368-000	Proband	NRXN1 430kb deletion/+	Deletion	de novo	chr2:50567944-51057790del	---	---	---	---	---	---
C	1-0262-002	Unaffected father	Family control	---	---	---	---	8p22-p21.3 823kb duplication/+ RNF148 p.R225X/+ CHD7 p.E1897K/+	Duplication Nonsense Missense		chr8:18569001-19407000 Chr7:122342132G>A Chr8:61764601G>A	Impacts PDS3, SH2D4A NM_198085.1: p.(Arg225*) NM_017780.3: p.(Glu1897Lys)
	1-0262-003	Proband	DLGAP2 791kb duplication/+	Duplication	de novo	chr8:704001-1535000dup	---	8p22-p21.3 823kb duplication/+ RNF148 p.R225X/+ CHD7 p.E1897K/+ RAI1 p.G1864R/+	Duplication Nonsense Missense Missense	Paternal Paternal Paternal Maternal	chr8:18569001-19407000 Chr7:122342132G>A Chr8:61764601G>A Chr17:17707094G>A	Impacts PDS3, SH2D4A NM_198085.1: p.(Arg225*) NM_017780.3:p.(Glu1897Lys) NM_030665.3: p.(Gly1864Arg)
	1-0262-004	Affected brother	Family control	---	---	---	---	8p22-p21.3 823kb duplication/+ RNF148 p.R225X/+ CHD7 p.E1897K/+ RAI1 p.G1864R/+	Duplication Nonsense Missense Missense	Paternal Paternal Paternal Maternal	chr8:18569001-19407000 Chr7:122342132G>A Chr8:61764601G>A Chr17:17707094G>A	Impacts PDS3, SH2D4A NM_198085.1: p.(Arg225*) NM_017780.3:p.(Glu1897Lys) NM_030665.3: p.(Gly1864Arg)
D	1-0582-002	Unaffected father	Family control	---	---		---	---	---	---	---	---
	1-0582-003	Proband	CNTN5 676kb deletion	Deletion	Maternal	chr11:99477401-100157000del	---	---	---	---	---	---
E	7-0058-003	Proband	AGBL4 323kb deletion/+	Deletion	Paternal	chr1:49894000-50224000del	---	2q21.1 516kb duplication/+ HTR3A p.G148X/+	Duplication Nonsense	de novo Paternal	Chr2:131476000-131932000 Chr11:113853891C>T	Impacts GPR148, AMER3, ARHGEF4, FAM168B NM_213621.3: p.(Gln148*)
ASD Candidate Gene - SNVs
F	2-1305-005	Unaffected brother	Family control	---	---	---	---	---	---	---	---	---
	2-1305-003	Proband	CAPRIN1 p.Q399X/+	Nonsense	de novo	chr11:34107924C>T	NM_005898.4: p.(Gln399*)	TCFL2 p.L601S/+	Missense	Paternal	Chr10:114925724T>C	NM_001146274.1: p.(Leu601Ser)
G	2-1186-002	Unaffected father	family control	---	---	---	---	---	---	---	---	---
	2-1186-003	Proband	VIP p.Y73X/+	Nonsense	de novo	chr6:153075412T>A	NM_003381.3: p.(Tyr73*)	---	---	---	---	---
H	2-1303-004	Unaffected brother	Family control	---	---	---	---	---	---	---	---	---
	2-1303-003	Proband	ANOS1 p.R423X	Nonsense	de novo	chrX:8522080G>A	NM_000216.3: p.(Arg423*)	---	---	---	---	---
	2-1303-003	Corrected proband	CRISPR-corrected ANOS1 p.X423R	Corrected	---	---	---	---	---	---	---	---
I	1-0273-002	Unaffected father	Family control	---	---	---	---	---	---	---	---	---
	1-0273-003	Proband	THRA p.R384C/+	Missense	de novo	chr17:38245626C>T	NM_199334.3: p.(Arg384Cys)	IQSEC p.P1104L	Missense	Maternal	ChrX:53265644G>A	NM_001111125.2: p.(Pro1104Leu)
Functional ASD Candidate Genes - SNVs
J	1-0494-005	Unaffected brother	Family control	---	---	---	---	---	---	---	---	---
	1-0494-003	Proband MZ twin	SET c.112+1G>C/+	Splice site	de novo	chr9:131446287G>C	NM_001122821.1: p.?	---	---	---	---	---
	1-0494-004	Affected MZ twin	SET c.112+1G>C/+	Splice site	de novo	chr9:131446287G>C	NM_001122821.1: p.?	---	---	---	---	---
K	7-0254-001	Unaffected mother	GLI3 p.G727R/+	Missense	---	chr7:42007446C>T	NM_000168.5: p.(Gly727Arg)	LAMC3 p.S1474L/+	Missense	---	Chr9:133963148C>T	NM_006059.3: p.(Ser1474Leu)
	7-0254-002	Unaffected father	GLI3 p.G465R/+	Missense	---	chr7:42063171C>G	NM_000168.5: p.(Gly465Arg)	UNC79 p.R525Q/+	Missense	---	Chr14:94008861G>A	NM_001346218.1: p.(Arg525Gln)
	7-0254-003	Proband	GLI3 p.G727R/+, mat GLI3 pG465R/+, pat KIF21A p.R1156G/+ (mosaic 23%)	Missense Missense Missense	Maternal Paternal de novo	chr7:42007446C>T chr7:42063171C>G chr12:39716675T>C	NM_000168.5: p.(Gly727Arg) NM_000168.5: p.(Gly465Arg) NM_001173464.1: p.(Arg1156Gly)	UNC79 p.R525Q/+ LAMC3, p.S1474L/+	Missense Missense	Paternal Maternal	Chr14:94008861G>A Chr9:133963148C>T	NM_001346218.1: p.(Arg525Gln) NM_006059.3: p.(Ser1474Leu)
	7-0254-004	Affected brother	GLI3 p.G727R/+ GLI3 pG465R/+	Missense Missense	Maternal Paternal	chr7:42007446C>T chr7:42063171C>G	NM_000168.5: p.(Gly727Arg) NM_000168.5: p.(Gly465Arg)	UNC79 p.R525Q/+ LAMC3 p.S1474L/+	Missense Missense	Paternal Maternal	Chr14:94008861G>A Chr9:133963148C>T	NM_001346218.1: p.(Arg525Gln) NM_006059.3: p.(Ser1474Leu)
L	6-0393-001	Unaffected mother	Family control	---	---	---	---	---	---	---	---	---
	6-0393-003	Proband	EHMT2 p.K1164Nfs/+ UBE2I p.E78K/+	Frameshift Missense	de novo de novo	chr6:31848002del chr16:1370183G>A	NM_006709.4: p.p.(Lys1164Asnfs*?) NM_003345.4: p.(Glu78Lys)	---	---	---	---	---

## Sheet: Sheet1
Table S1 Genomic coordinates of the genetic variant(s) associated with each participant.
			Primary genetic variants				Other ASD impllcated variants
Family ID	MSSNG ID	Status	Description	Primary variant type	Coordinates (hg19)	Isoform and amino acid change	Description	Coordinates	Amino Acid change
ASD Candidate Gene - CNVs
A	1-0019-002	Unaffected father	family and study control	---			---
	1-0019-004	Proband	16p11.2 deletion syndrome	CNV, loss	chr16:29584000-30200000	NA	---
B	3-0368-000	Proband	NRXN1 430kb loss/+, de novo	CNV, loss	chr2:50567944-51057790	NA	---
C	1-0262-002	Unaffected father	family control	---			8p22-p21.3 823kb dup/+ RNF148, p.R225X/+ CHD7 p.E1897K/+	chr8:18569001-19407000 Chr7:122342132G>A Chr8:61764601G>A	Impacts PDS3, SH2D4A NM_198085.1: p.(Arg225*) NM_017780.3: p.(Glu1897Lys)
	1-0262-003	Proband	DLGAP2 791kb gain/+, de novo;	CNV, gain	chr8:704001-1535000dup	NA	8p22-p21.3 823kb dup/+, pat RNF148 p.R225X, pat CHD7 p.E1897K, pat RAI1 p.G1864R, mat	chr8:18569001-19407000 Chr7:122342132G>A Chr8:61764601G>A Chr17:17707094G>A	Impacts PDS3, SH2D4A NM_198085.1: p.(Arg225*) NM_017780.3:p.(Glu1897Lys) NM_030665.3: p.(Gly1864Arg)
	1-0262-004	Affected brother	family control	---			8p22-p21.3 823kb gain/+, pat RNF148 p.R225X/+, pat CHD7 p.E1897K/+, pat RAI1 p.G1864R/+, mat	chr8:18569001-19407000 Chr7:122342132G>A Chr8:61764601G>A Chr17:17707094G>A	Impacts PDS3, SH2D4A NM_198085.1: p.(Arg225*) NM_017780.3:p.(Glu1897Lys) NM_030665.3: p.(Gly1864Arg)
H	1-0582-002	Unaffected father	family control	---			---
	1-0582-003	Proband	CNTN5, 676kb loss/+, mat	CNV, loss	chr11:99477401-100157000		---
I	7-0058-003	Proband	AGBL4 323kb loss/+, pat;	CNV, loss	chr1:49894000-50224000		2q21.1 516kb dup/+, de novo HTR3A p.G148X, pat	chr2:131476000-131932000 Chr11:113853891C>T	Impacts GPR148, AMER3, ARHGEF4, FAM168B NM_213621.3: p.(Gln148*)
ASD Candidate Gene - SNVs
D	2-1305-005	Unaffected brother	family control	---			---
	2-1305-003	Proband	CAPRIN1 p.Q399X/+, de novo	SNV, nonsense	Chr11:34107924C>T	NM_005898.4: p.(Gln399*)	TCFL2 p.L601S/+, pat	Chr10:114925724T>C	NM_001146274.1: p.(Leu601Ser)
E	2-1186-002	Unaffected father	family control	---			---
	2-1186-003	Proband	VIP p.Y73X/+, de novo	SNV, nonsense	Chr6:153075412T>A	NM_003381.3: p.(Tyr73*)	---
F	2-1303-004	Unaffected brother	family control	---			---
	2-1303-003	Proband	ANOS1 p.R423X, de novo	SNV, nonsense	chrX:8522080G>A	NM_000216.3: p.(Arg423*)	---
	2-1303-003	Corrected proband	CRISPR-corrected ANOS1, p.X423R	corrected SNV, nonsense			---
G	1-0273-002	Unaffected father	family control	---			---
	1-0273-003	Proband	THRA p.R384C/+, de novo	SNV, missense	chr17:38245626C>T	NM_199334.3: p.(Arg384Cys)	IQSEC p.P1104L, mat	ChrX:53265644G>A	NM_001111125.2: p.(Pro1104Leu)
Functional ASD Candidate Genes
J	1-0494-005	Unaffected brother	family control	---			---
	1-0494-003	Proband MZ twin	SET c.112+1G>C/+, de novo	SNV, splice site	chr9:131446287G>C	NM_001122821.1: p.?	---
	1-0494-004	Affected MZ twin	SET c.112+1G>C/+, de novo	SNV, splice site	chr9:131446287G>C	NM_001122821.1: p.?	---
K	7-0254-001	Unaffected mother	GLI3 p.G727R/+	SNV, missense	chr7:42007446C>T	NM_000168.5: p.(Gly727Arg)	LAMC3, p.S1474L	Chr9:133963148C>T	NM_006059.3: p.(Ser1474Leu)
	7-0254-002	Unaffected father	GLI3 p.G465R/+	SNV, missense	chr7:42063171C>G	NM_000168.5: p.(Gly465Arg)	UNC79, p.R525Q	Chr14:94008861G>A	NM_001346218.1: p.(Arg525Gln)
	7-0254-003	Proband	GLI3 p.G727R/+, mat; GLI3, pG465R/+, pat; KIF21A, p.R1156G/+ (mosaic 23%), de novo	SNV, missense	chr7:42007446C>T chr7:42063171C>G chr12:39716675T>C	NM_000168.5: p.(Gly727Arg) NM_000168.5: p.(Gly465Arg) NM_001173464.1: p.(Arg1156Gly)	UNC79, p.R525Q, pat LAMC3, p.S1474L, mat	Chr14:94008861G>A Chr9:133963148C>T	NM_001346218.1: p.(Arg525Gln) NM_006059.3: p.(Ser1474Leu)
	7-0254-004	Affected brother	GLI3, p.G727R/+, mat; GLI3 pG465R/+, pat	SNV, missense	chr7:42007446C>T chr7:42063171C>G	NM_000168.5: p.(Gly727Arg) NM_000168.5: p.(Gly465Arg)	UNC79, p.R525Q, pat LAMC3, p.S1474L, mat	Chr14:94008861G>A Chr9:133963148C>T	NM_001346218.1: p.(Arg525Gln) NM_006059.3: p.(Ser1474Leu)
L	6-0393-001	Unaffected mother	family control	---	---		---
	6-0393-003	Proband	EHMT2 p.K1164Nfs/+, de novo; UBE2I, p.E78K/+, de novo	SNV, frameshift, missense	chr6:31848002del chr16:1370183G>A	NM_006709.4: p.p.(Lys1164Asnfs*?) NM_003345.4: p.(Glu78Lys)	---
