# Supplementary material for: CNTN5-/+or EHMT2-/+human iPSC-derived neurons from individuals with autism develop hyperactive neuronal networks
Source: eLife. 2019 Feb 12;8:e40092. doi: 10.7554/eLife.40092 (PMC6372285; doi:10.7554/eLife.40092)
Supplement: Supplementary file 2. [file elife-40092-supp2.xlsx]

## Sheet: Sheet1
iPSC line ID	Pluripotency - Flow Cytometry (% of expressing cells)			Pluripotency - qRT-PCR (% relative expression)			Germ layer - qRT-PCR (fold induction)			STR analysis	Karyotype
	SSEA4	Tra-1-60	OCT4	OCT4	NANOG	DNMT3B	Endoderm (AFP)	Mesoderm (HAND1)	Ectoderm (PAX6)
19-2	was described previously (Deneault et al., 2018)
NR3	95.2	98.5	94.2	88	101	111	355	1678	13.8	consistent	normal 46 XY
16K	87.5	90.8	87.2	112	101	159	375	1893	7.8	consistent	normal 46 XY
16N	97.2	98.3	98.3	141	100	211	647	1018	264	consistent	normal 46 XY
15E	86.8	94.6	89.6	124	152	99 (REX1)	1572	144	11	consistent	normal 46 XY
15G	87.3	91.7	91.9	131	126	139 (REX1)	48.9	1893	29.7	consistent	normal 46 XY
17E	90.2	96.4	88.1	106	152	174	336	762	20.1	consistent	normal 46 XY
17G	86.8	93.5	83.1	135	111	159	313	408	30.8	consistent	normal 46 XY
26E	87.4	93.5	93.4	103	107	108	34901	2707	14	consistent	normal 46 XY
26J	83.2	96.5	97.4	110	151	211	613	560	9	consistent	normal 46 XY
27H	97.2	99.2	94	161	194	224	352	1256	11.1	consistent	normal 46 XY
27N	80	98.1	93.6	124	131	211	4417	175	1.9	consistent	normal 46 XY
36O	88.3	97.4	95.2	107	155	167	390	30.3	252 (SOX1)	consistent	normal 46 XY
36P	92.4	97.8	96.5	98	135	138	5349	651	17.5 (SOX1)	consistent	normal 46 XY
21H	92.4	99	92.7	77	106	133	38739	267	20	consistent	normal 46 XY
21P	95.7	95.8	88.8	135	160	249	204	291	7.4	consistent	normal 46 XY
20C	76.3	84.3	79.3	112	78	191	14502	20707	47	consistent	normal 46 XY
20E	82.4	97.5	85.8	93	93	213	52317	12944	45.9	consistent	normal 46 XY
75G	89.7	88.3	91.1	123	109	176	11889	17890	34	consistent	normal 46 XY
75H	82.4	95.6	89.7	98	96	211	45632	11543	39.9	consistent	normal 46 XY
54E	99.6	99.7	99.7	95	99	96	6470 (SOX17)	34800	187 (SOX1)	consistent	normal 46 XY
54G	99.9	99.9	99.9	81	100	82	8720 (SOX17)	19000	216 (SOX1)	consistent	normal 46 XY
53G	97.1	99.4	99.3	173	119	166	10900 (SOX17)	44100	145 (SOX1)	consistent	normal 46 XY
53H	96.9	97.8	99	88	103	100	18400 (SOX17)	36200	124 (SOX1)	consistent	normal 46 XY
19A	86.7	98.6	92.9	150	134	189 (REX1)	13674	1707	28.6	consistent	normal 46 XY
18C	75.9	91.8	84.2	86	61	126	2888	563	4.46	consistent	normal 46 XY
18E	80.5	85	82.5	99	138	149 (REX1)	83600	100	47.1	consistent	normal 46 XY
51C	95.2	99.1	99.2	106	111	91	5390 (SOX17)	13400	1900 (SOX1)	consistent	normal 46 XY
51E	92.9	97.7	99.2	104	106	113	7340 (SOX17)	29200	358 (SOX1)	consistent	normal 46 XY
52A	82.3	86.6	94.3	98	108	103	22300 (SOX17)	31700	224 (SOX1)	consistent	normal 46 XY
52C	95.6	98.8	99.4	120	115	114	10400 (SOX17)	43800	102 (SOX1)	consistent	normal 46 XY
50A	99.6	99.9	100	84	109	159	11900 (SOX17)	9600	84.4 (SOX1)	consistent	normal 46 XY
50B	98.7	99.8	99.6	99	102	113	10700 (SOX17)	15400	351 (SOX1)	consistent	normal 46 XY
50H	99.5	99.9	99.9	109	120	114	8890 (SOX17)	23600	129 (SOX1)	consistent	normal 46 XY
48K	99.2	99.9	99.9	85	82	181	2510 (SOX17)	3284	1727 (SOX1)	consistent	normal 46 XY
48N	98.5	99.4	99.8	155	149	177	3613 (SOX17)	2709	618 (SOX1)	consistent	normal 46 XY
49G	99.3	100	100	90	81	169	6619 (SOX17)	4792	2621 (SOX1)	consistent	normal 46 XY
49H	94.7	99.7	99.4	91	82	111	3328 (SOX17)	32984	452 (SOX1)	consistent	normal 46 XY
64N	98.7	99.7	99.1	132	146	98	9250 (SOX17)	22600	67 (SOX1)	consistent	normal 46 XX
64Q	89	94.5	96.9	104	107	104	9300 (SOX17)	53881	83 (SOX1)	consistent	normal 46 XX
63Q	99.4	99.7	99.4	101	103	107	8300 (SOX17)	88500	116 (SOX1)	consistent	normal 46 XY
63T	98.1	99.1	99.9	85	91	106	7900 (SOX17)	56200	75 (SOX1)	consistent	normal 46 XY
62M	99.1	99.1	98	110	109	101	11200 (SOX17)	56800	205 (SOX1)	consistent	normal 46 XX
62X	99.8	99.9	99.9	105	109	110	13300 (SOX17)	26600	90 (SOX1)	consistent	normal 46 XX
61I	88.8	98.1	97.4	105	110	102	15500 (SOX17)	56800	143 (SOX1)	consistent	normal 46 XY
61K	85.6	99	99.5	94	98	128	5700 (SOX17)	98900	157 (SOX1)	consistent	normal 46 XY
37E	90.1	96.5	94.6	116	114	131	33584	736	145	consistent	normal 46 XX
38B	83.5	93.6	86	102	142	199	4060	1375	17	consistent	normal 46 XX
38E	89.7	96.6	97.2	92	116	115	793	334	57	consistent	normal 46 XX
