# Supplementary material for: CNTN5-/+or EHMT2-/+human iPSC-derived neurons from individuals with autism develop hyperactive neuronal networks
Source: eLife. 2019 Feb 12;8:e40092. doi: 10.7554/eLife.40092 (PMC6372285; doi:10.7554/eLife.40092)
Supplement: Supplementary file 3. [file elife-40092-supp3.xlsx]

## Sheet: Sheet1
			MEA plate ID																					Total nb different wells	Total nb independent experiments*
Family ID	iPSC ID	MSSNG ID	1	2	3	6	7	8	9	10	11	13	14	15	16	17	18	19	22	26	29	33	37
A	19-2	1-0019-002																		8		8	8	24	3
	19-2-CNTN5-/+	1-0019-002																		8		8	8	24	3
	19-2-EHMT2-/+	1-0019-002																		8		8	8	24	3
B	NR3	3-0368-000	3					6																9	2
C	16K	1-0262-002				4						8												12	2
	16N	1-0262-002	3									8												11	2
	15E	1-0262-003				6						8												14	2
	15G	1-0262-003	3			6						8												17	3
	17E	1-0262-004				6						8												14	2
	17G	1-0262-004				6						8												14	2
D	26E	1-0582-002	3											12										15	2
	26J	1-0582-002				6	6							12										24	3
	27H	1-0582-003	3				6							12										21	3
	27N	1-0582-003	3				6							12										21	3
E	36O	7-0058-003	3						6	6														15	3
	36P	7-0058-003		3		8	6		6															23	4
F	21H	2-1305-005																						0	0
	21P	2-1305-005					6						12											18	2
	20C	2-1305-003					6						12											18	2
	20E	2-1305-003																						0	0
	75G	2-1305-003											12											12	1
	75H	2-1305-003					6						12											18	2
G	54E	2-1186-002						6								12								18	2
	54G	2-1186-002					6	6								12								24	3
	53G	2-1186-003						6								12								18	2
	53H	2-1186-003														12								12	1
H	19A	2-1303-004				6			6												6			18	3
	18C	2-1303-003	3						6												6			15	2
	18E	2-1303-003	3						6												6			15	3
	18CW	2-1303-003	3						6												6			15	3
I	51C	1-0273-002						8							12									20	2
	51E	1-0273-002	3					4							12									19	3
	52A	1-0273-003	3					6							12									21	3
	52C	1-0273-003		3				6							12									21	3
J	50A	1-0494-005								6									8					14	2
	50B	1-0494-005								6									8					14	2
	50H	1-0494-005	3							6														9	2
	48K	1-0494-003	3							6									8					17	3
	48N	1-0494-003								6									8					14	2
	49H	1-0494-004								6									8					14	2
	49G	1-0494-004	3							6									8					17	3
K	64N	7-0254-001			6						6						6							18	3
	64Q	7-0254-001			6						6						6							18	3
	63Q	7-0254-002			6						6						6							18	3
	63T	7-0254-002			6						6						6							18	3
	62M	7-0254-003			6						6						6							18	3
	62X	7-0254-003			6						6						6							18	3
	61I	7-0254-004			6						6						6							18	3
	61K	7-0254-004			6						6						6							18	3
L	37E	6-0393-001	3						6									8			6			23	4
	38B	6-0393-003																8			6			14	2
	38E	6-0393-003							6									8			6			20	3
